# Supplementary material
Source: Springer Nature journal article supplement (https://www.springermedizin.de/resource/supplementary/12936_2013_2825_MOESM8_ESM.pdf/9544206)

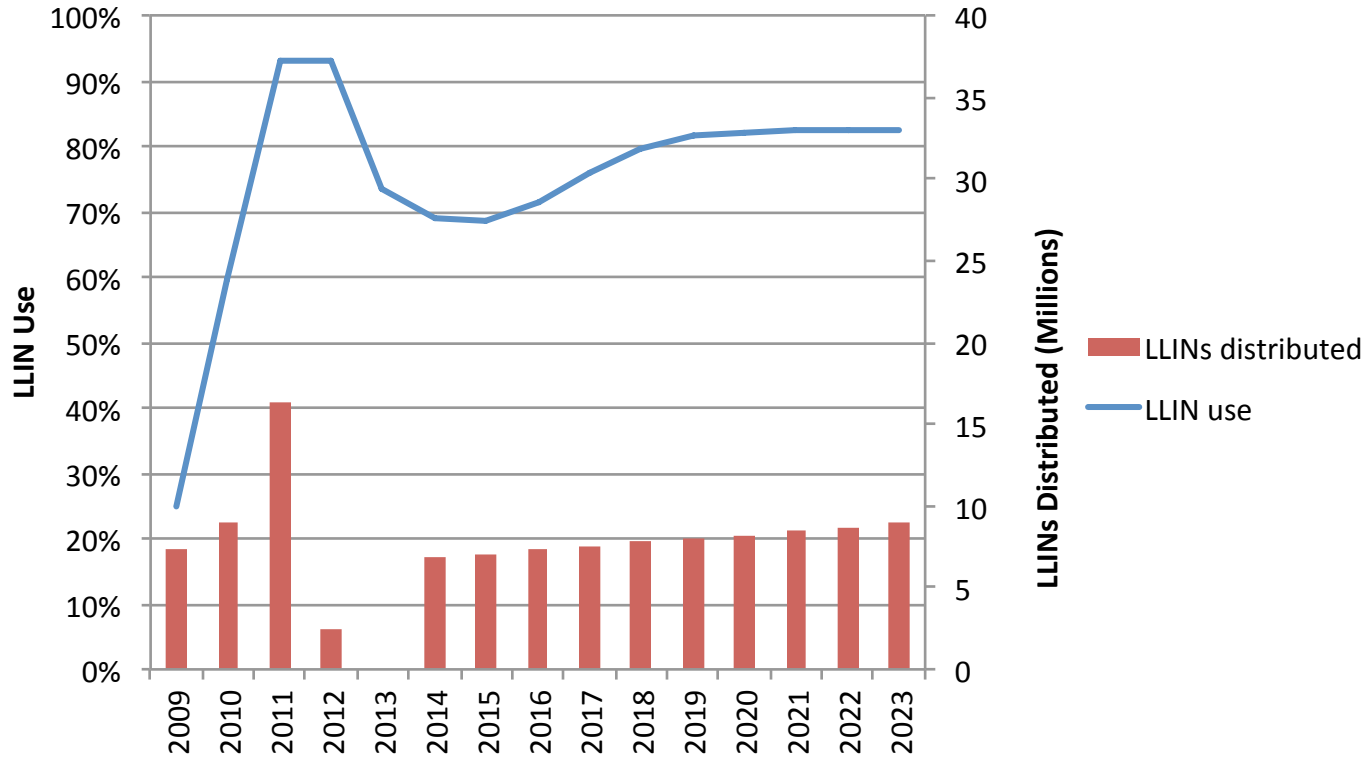

Supplement: MOESM8 [file 9544206]
